# Supplementary material for: Entinostat in combination with nivolumab in metastatic pancreatic ductal adenocarcinoma: a phase 2 clinical trial
Source: PubMed Central journal article supplement (PMC11557583; doi:10.1038/s41467-024-52528-7), 2024-11-12
Supplement: 41467_2024_52528_MOESM3_ESM.pdf [file 41467_2024_52528_MOESM3_ESM.pdf]

## **Description of Additional Supplementary Files**

**Supplementary Data 1** - mIHC Cell Densities

**Supplementary Data 2** - mIHC Wilcox pValues Densities

**Supplementary Data 3** - mIHC Percentages

**Supplementary Data 4** - mIHC Wilcox pValues Percentage

**Supplementary Data 5** - mIHC Ratios

**Supplementary Data 6** - CyTOF Cell Type Annotation

**Supplementary Data 7** - CyTOF Myeloid Proportions

**Supplementary Data 8** - CyTOF Myeloid Wilcox pValues Proportions

**Supplementary Data 9** - CyTOF Myeloid and B cells Markers Expression

**Supplementary Data 10** - CyTOF Myeloid and B cells Wilcox pValues Markers Expression

**Supplementary Data 11** - Cytokines Panel

**Supplementary Data 12** - Cytokines values at different timepoints

**Supplementary Data 13** - Cytokine Wilcox pValues

**Supplementary Data 14** - CyTOF Lymphoid cells Proportions

**Supplementary Data 15** - CyTOF Lymphoid populations Wilcox pValues Proportions

**Supplementary Data 16** - Top Differential Expressed Genes between Baseline and C1D1

**Supplementary Data 17** - Top Differential Expressed Genes between Baseline and C2D1

**Supplementary Data 18** - Top Differential Expressed Genes Between C1D1 and C2D1

**Supplementary Data 19** - Hallmark Pathway Analysis Baseline versus C2D1

**Supplementary Data 20** - Hallmark Pathway Analysis C1D1 versus C2D1

**Supplementary Data 21** - Hallmark Pathways Analysis Baseline versus C1D1

**Supplementary Data 22** - CyTOF panel design for myeloid cell populations

**Supplementary Data 23** - CyTOF panel design for lymphoid cell populations

**Supplementary Data 24** - Antibody-metal conjugation kits used in CyTOF panel designs

**Supplementary Data 25** - RNAseq
